# Supplementary material for: Coupling effects of phosphorus fertilization source and rate on growth and ion accumulation of common bean under salinity stress
Source: PeerJ. 2021 Jun 4;9:e11463. doi: 10.7717/peerj.11463 (PMC8183427; doi:10.7717/peerj.11463)
Supplement: Supplemental Information 1 [file peerj-09-11463-s001.xlsx]

## Sheet: Sheet1
Raw data
	P form	P rate	Block	TC	Car	RNA	DNA	S N	R N	S P	R P	S K	R K	S Mg	R Mg	S Na	R Na	S Ca	R Ca	S K/Na	R K/Na	S Ca/Na	R Ca/Na	S Fe	R Fe	S Mn	R Mn	S Zn	R Zn	S Cu	R Cu	PlH	LA dm2	Sh DW	R DW	TDW	TDW t/ha
	1	1	1	0.46	0.315	807.257	345.935	27.7	20.4	1.9	1	22.1	8	9.6	3.4	0.59	0.94	18.5	0.4	37.4576	8.51064	31.3559	0.425532	271	2057	59	83.5	58	30	10.5	15	28.5	2.06	2.83	0.29	3.12	0.936
	1	1	2	0.455	0.3091	790.262	330.56	27.1	20	2	1	21.9	8.2	8.8	3.5	0.59	0.92	18.8	0.4	37.1186	8.91304	31.8644	0.434783	280	2110	58	84	57	29	11	16	27	2.19	2.97	0.28	3.25	0.975
	1	1	3	0.445	0.314	815.754	322.872	26.9	19.8	1.8	1.1	22.2	8.5	9.9	3.6	0.58	0.93	19.1	0.4	38.2759	9.13978	32.931	0.430108	283	2030	55	85	61	31	9.5	17	28.3	1.91	2.7	0.27	2.97	0.891
	1	2	1	0.477	0.328	951.713	407.434	33.3	18.7	2.2	1.2	22.5	9.3	10.6	3.9	0.51	0.88	19.5	0.4	44.1176	10.5682	38.2353	0.454545	576	1834	66	72.5	59.5	36.5	11.6	14	30.5	2.89	3.47	0.4	3.87	1.161
	1	2	2	0.467	0.323	926.221	407.434	32.7	18.2	2	1.2	23.2	9.5	10.2	3.8	0.52	0.86	20.1	0.5	44.6154	11.0465	38.6538	0.581395	570	1835	70	71	65	35	11	14	31	2.89	3.35	0.39	3.74	1.122
	1	2	3	0.457	0.328	943.216	395.903	33.8	18.3	2.1	1.2	23.4	10	11	3.9	0.53	0.87	21.1	0.5	44.1509	11.4943	39.8113	0.574713	565	1851	68	75	61	36	11.2	14.5	32	2.87	3.57	0.39	3.96	1.188
	1	3	1	0.558	0.419	1164.15	491.996	35.3	15.8	2.3	1.4	23.5	12	11.3	4	0.47	0.79	21.5	0.6	50	15.1899	45.7447	0.759494	615	1429	88.5	48	66.5	37	14	13.5	35.5	4.27	5.1	0.49	5.59	1.677
	1	3	2	0.548	0.4142	1113.16	468.933	33.7	15.9	2.4	1.6	22.9	11.3	11	4	0.46	0.81	21.8	0.6	49.7826	13.9506	47.3913	0.740741	619	1440	89	51	67	38	13	12.6	37.5	4.23	5.37	0.54	5.91	1.773
	1	3	3	0.538	0.409	1096.17	461.246	36.1	15.8	2.5	1.5	23.4	11.9	11.4	3.9	0.46	0.81	21.6	0.5	50.8696	14.6914	46.9565	0.617284	620	1430	89.5	53	69	37	13	13	32.5	4.07	5.25	0.52	5.77	1.731
	1	4	1	0.491	0.35	960.211	411.278	33.8	14.5	2.4	1.8	21.5	10	9.4	4.3	0.42	0.73	23.5	0.5	51.1905	13.6986	55.9524	0.684932	724	1250	93	43	64	38	11.5	12	33.5	3.75	4.82	0.49	5.31	1.593
	1	4	2	0.499	0.3529	977.206	415.121	31.9	14.1	2.2	1.9	21	9.1	9.5	4.4	0.42	0.68	23.4	0.6	50	13.3824	55.7143	0.882353	730	1260	95	42	65	38	12	13	32	3.9	4.66	0.42	5.08	1.524
	1	4	3	0.495	0.368	1232.13	430.496	32.2	14.5	2.5	1.9	21.1	11.1	10.1	3.9	0.41	0.71	23.8	0.4	51.4634	15.6338	58.0488	0.56338	740	1231	94	40	62	39	11	11.5	34	3.8	4.71	0.42	5.13	1.539
	2	1	1	0.522	0.406	892.231	365.153	29.6	19.8	2	1.1	22.9	8.2	9.9	3.3	0.58	0.9	19.1	0.5	39.4828	9.11111	32.931	0.555556	279	2007	61.3	80.5	59.7	31	10.8	15	30.2	2.6	3.03	0.32	3.35	1.005
	2	1	2	0.542	0.401	866.739	353.622	29	19.4	2.1	1.1	22.6	8.4	9.1	3.1	0.58	0.89	19.4	0.5	38.9655	9.4382	33.4483	0.561798	288	2010	63.9	84	58.7	31	11.3	16	28.6	2.64	3.18	0.35	3.53	1.059
	2	1	3	0.562	0.406	909.226	342.091	28.8	19.2	1.9	1.1	23	9.4	10.2	3.4	0.57	0.92	19.8	0.4	40.3509	10.2174	34.7368	0.434783	291	2030	60	79.1	62.8	32	9.8	15	30	2.54	3.22	0.31	3.53	1.059
	2	2	1	0.565	0.453	1045.19	411.278	34.8	17.2	2.4	1.3	24	10	11.5	3.6	0.5	0.81	20.8	0.4	48	12.3457	41.6	0.493827	586	1803	71	71.5	64	36.5	12.5	13.4	32	3.44	4.33	0.45	4.78	1.434
	2	2	2	0.568	0.4581	1002.7	438.184	34.4	16.9	2.3	1.3	23.5	10.5	12	3.7	0.5	0.82	21.2	0.5	47	12.8049	42.4	0.609756	582	1800	72	71	64	37	13	13	34	3.45	4.11	0.42	4.53	1.359
	2	2	3	0.565	0.453	1036.69	445.871	34.1	16.9	2.3	1.3	23.9	11	11.8	3.9	0.5	0.83	20.9	0.5	47.8	13.253	41.8	0.60241	580	1815	75	70	63	37	13	13.4	33	3.34	3.93	0.43	4.36	1.308
	2	3	1	0.62	0.512	1232.13	565.026	36.7	15.2	2.8	1.6	23.5	11.5	12.4	3.8	0.44	0.77	22	0.6	53.4091	14.9351	50	0.779221	632	1329	90	45.5	69	37	14	12.5	37	5.65	6.26	0.65	6.91	2.073
	2	3	2	0.632	0.516	1274.62	549.652	34	15.1	2.7	1.9	23.6	11.1	12.3	3.7	0.44	0.77	22.9	0.6	53.6364	14.4156	52.0455	0.779221	641	1320	91	47	71	38	15	13	39	5.22	6.37	0.67	7.04	2.112
	2	3	3	0.645	0.512	1283.11	553.495	36.5	16	2.6	1.6	23.8	11.6	12.1	3.8	0.45	0.76	22.2	0.7	52.8889	15.2632	49.3333	0.921053	625	1421	94	44	68	39	16	12.5	38	5.42	6.43	0.64	7.07	2.121
	2	4	1	0.572	0.46	1130.16	453.559	34.4	14.2	2.6	2	22.5	8.4	10.8	3.8	0.4	0.67	24.5	0.5	56.25	12.5373	61.25	0.746269	745	1196	95	40	66	39.4	11.5	11	39	5.07	5.71	0.54	6.25	1.875
	2	4	2	0.568	0.47	1087.67	468.933	33.1	13.3	2.5	1.9	22.6	8.9	10.4	4	0.41	0.71	24.9	0.5	55.122	12.5352	60.7317	0.704225	740	1200	96	38	65	39	12	11	35	4.92	5.6	0.53	6.13	1.839
	2	4	3	0.572	0.465	1172.65	468.933	34.2	13.9	2.8	2.2	21.9	9.2	11	3.9	0.41	0.72	24.9	0.4	53.4146	12.7778	60.7317	0.555556	739	1201	96	39	65	39.7	13	12	36	4.83	5.71	0.55	6.26	1.878
